# Supplementary material
Source: Springer Nature journal article supplement (https://www.springermedizin.de/resource/supplementary/12985_2010_1084_MOESM3_ESM.pdf/9609106)
Supplement: MOESM3 [file 9609106]

VR-2332 VEAATQTIKLPQVNCRALVPVVTQKSLDNNVPLTAFSLANYYYRAQGDEVHRERLTAVLKLEKVVREEYGLMPTEPGPRPTLPRGLDELKQMEED  
07NP2 . . . . . T . F . . . . . Y . . . . . I . . . . . E . S . . . . . H . A S . R . . . . . A . S . S . E E . T . .  
07NP4 . . . . . T . F . . . . . Y . . . . . I . . . . . E . S . . . . . H . A S . R . . . . . A . S . S . E E . T . .  
78/51 . . . . . T . F . . . . . Y . . . . . I . . . . . A . . . . . S H . . . . . H . A S . G . . . . . A . S . S . E E . T . .  
8NP154 . D . A . T E . . . . . M A . . . . . A E . . . . . D N S . M . . . . .  
08RB1 . D . A . T G . . . . . V M A . . . . . V E . . . . . D N S . M . . . . .  
8NP46 . D . . . . . T E . . . . . M A . . . . . A H E . . . . . D N . . . . . M . . . . .  
8NP59 . D . V V . . . . .  
01CS1/2 . D . . . . . R . T E Q . . . . . A E . . . . . S E . . . . . H . . . . . L . D . N S . . . . . G . . . . . V L . . . . . Q . A . S . S . . . . .  
8NP148 . D . . . . . W . T E Q . . . . . A E . . . . . E . . . . . H . . . . . H . D . N S . . . . . G . . . . . V . G . . . . . Q . A . S . S . . . . .  
8NP147 . . . . . T . A . . . . . P T P . . . . . M A . . . . . S . . . . . S . . . . . C . . . . . E . C . . . . . N T . . . . . D . . . . . T S A . . . . . L . A . N . S . . . . .  
SY0608 . . . . . N . . . . . T E Q . H . . . . . S . C T . . . . . P . R E P . G K D . . . . . S . C . P . . . . . N F . . . . . E . L . . . . . S . G L . . . . . V . S . . . . .

VR-2332 LLKLANAQTTSDMMAWAVEQVDLKTWVKNYPRWTPPPPPPKVQPRKTKPVKSLPERKVPVAPRRKVGSDCGSPVSLGGDVPNSWEDLAVSSPFDLPTPPE  
07NP2 . P R M . . . . . A . K . . . . . G . A . . . . . A . E . . . . . S . R . . . . . R . L A . S . G . . . . . G R . R . C . . . . . I . . . . . A G N . L . . . . . S . .  
07NP4 . P R M . . . . . A . K . . . . . G . A . . . . . A . E . . . . . S . R . . . . . R . L A . S . G . . . . . G R . R . C . . . . . I . . . . . A G N . L . . . . . S . .  
78/51 . P R M . . . . . A . K . . . . . G . A . . . . . A . E . . . . . S . R A . . . . . R . L A . . . . . G . . . . . G R . R . C . . . . . I . D . . . . . A G N . L . S . S . .  
8NP154 . . . . . S . . . . . R I . . . . . R A . T . . . . . G D . . . . . R . R . . . . . G . - D . N . S . R G . . . . . I T G N . L . P . A . L .  
08RB1 . . . . . S . . . . . R I . . . . . R . A . . . . . G . . . . . R . R . V . . . . . Q L - D D N I S S N . . . . . N . T A G R S L . . . . . A . . . . .  
8NP46 . . . . . S . . . . . R . . . . . R . A . . . . . G . . . . . R . R . V . . . . . Q L - D D N I . S G . . . . . A . R S L . . . . . A . . . . .  
8NP59 . . . . . S . . . . . R . . . . . A . . . . . G D . . . . . R . R . . . . . G . E . - D . N . S . R G . . . . . I T G N . L . P . V L L .  
01CS1/2 . . . . . I . . . . . A . E . . . . . A . . . . . A . . . . . R . . . . . R . . . . . G . . . . . R A R . N . . . . . L . L - D N N . S . . . . . T A G . S P . . . . . S . .  
8NP148 . . . . . I . . . . . A . E . . . . . R A . . . . . I . . . . . R . . . . . R . . . . . G . . . . . R A R . N . . . . . L . - D N . . . . . D . . . . . T A G C S L . . . . . S S V . .  
8NP147 . . . . . V . . . . . A . E . . . . . A . . . . . A . . . . . R . G M . . . . . R . . . . . G . . . . . R . N . . . . . I L S . D N L . . . . . N . . . . . G G . L . . . . . A . . . . .  
SY0608 . . . . . T . A . E . . . . . R . A . . . . . A . . . . . S . . . . . R . . . . . R . S . . . . . D . . . . . R . . . . . L M . D N . . . . . G S . E - T . G G . L N F . . . . . S . .

VR-2332 PATPSELVIVSSPQCIFRPATPLSEPAPIPAPRGTVSRPVTPLEPIPVAPARRKFQQVKRLSSAAAIPPYQDEPLDLSASSQTEYEA  
07NP2 S V A R . R . . T T A P K . . Q V S K . . . . . G . . . . . R I . P . S K . . S . . T . . S P . Q H . . L . . G S E N L . V . A L M C . . . . .  
07NP4 S V V R . R . . T T A P K . . Q V S K . V . . G . . . . . R I . P . S K . . S . . T . . S P . Q H . . L . . G S E N L . V . A L M C . . . . .  
78/51 S V A R . R . . T T T P K . . Q V S K . V . . G . . . . . R I . P . S K . . P . S T . . . . . P . Q H . . L . . G S E N L . V . A L M C . . . . .  
8NP154 S V . P R . . A . . P A L . H G . K . V . F G . . . . . V . . . . . R . . . . . S K . . S G . . T . . T L Q H . T L . E D A N L . V . A L A C . . . . . T . . . . .  
08RB1 . V A L P R . . A T A P A . . H V . K . V . . G . . . . . V . . . . . P Q S K I . S N . . T . . S . . Q H . . L . . E D A N L T . . A L T C R . K . . . . .  
8NP46 . V A L L K . P A T A P A . . H . - K L V . . G . . . . . V . . . . . R . . . . . S K . . S G . . T . . T L Q H . T L . E D A N L . V . A L T C . . . . . T . . . . .  
8NP59 S V . L P R . . T . A P A L . H G . K . V . S G . . . . . V . . . . . R . . . . . S K . . S G . . T . . T L Q H . T P L . E D A T L . V . A L T . . . . . T . . . . . H . . . . .  
01CS1/2 . V . L P . . A L A P T . . H . . . . . V . . . . . V . . . . . S K . . . . . T . . S . . L H . L . . E K A N L . . T M T F . V . . . . . R . . . . .  
8NP148 S V . P . . A L A P T L . H . . . . . V . . . . . V . . . . . R . . . . . S K . . . . . T . . S . . H . L . . E I A N L T . . T . T S . V . . . . . R . R N . . . . .  
8NP147 . . . . . L . . . . . A L T P V . . R N P G S V . . S G G . . . . . V . . . . . R . . P . . M . . R . T L A S . . Q H . . R . E E T T L V . . T . T C . . . . .  
SY0608 . M . . M . . P . L . P A S R R V P K L M . . G G S . . V . . . . . R . . . . . T T T L T H . . . . .
